# Supplementary material for: Terpene Coordinative Chain Transfer Polymerization: Understanding the Process through Kinetic Modeling
Source: MDPI journal article supplement (doi:10.3390/polym14122352), 2022-06-10
Supplement: s1 [file s1]

# Terpene Coordinative Chain Transfer Polymerization: Understanding the Process through Kinetic Modeling

Andrés Ubaldo-Alarcón<sup>1</sup>, Florentino Soriano-Corral<sup>1</sup>, Teresa Córdova, Iván Zapata-González<sup>1\*</sup>  
and Ramón Díaz-de-León<sup>1\*</sup>

<sup>1</sup> Centro de Investigación en Química Aplicada, Enrique Reyna Hermosillo, No.140,  
Col. San José de los Cerritos, Saltillo 25294, México.

\* Correspondence: IZG ivan.zapata@ciqa.edu.mx, Tel.: 52 844 4389830 ext. 1254; RDL  
ramon.diazdeleon@ciqa.edu.mx, Tel.: 52 844 4389830 ext. 1401

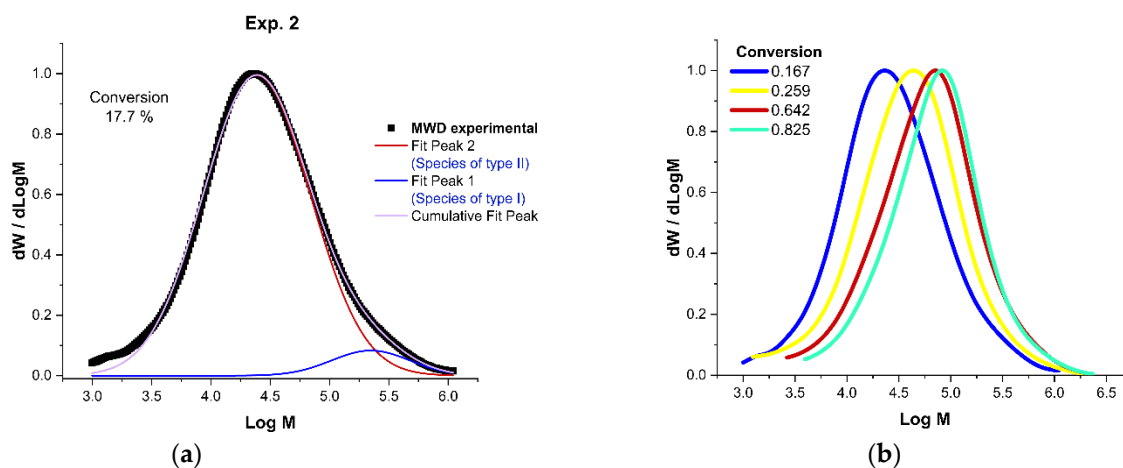

**Figure S1.** Molecular weight distributions for Exp 2: (a) MWD and the deconvolution 17.7% of conversion, (b) Evolution of the MWD in conversion.
